# Supplementary material
Source: publisher figshare collection journal article supplement (https://gsajournals.figshare.com/ndownloader/files/35373799)
Supplement: Supplementary file 1 [file 35373799]

## Sheet: Supplementary Table S17
Supplementary Table S17. Directionality of association between gene expression (PEER values) and nine tocochromanol phenotypes. Gene-trait pairs that were significant in TWAS (Table 2) are bolded.
Gene ID	Locus	αT	δT	γT	αT3	δT3	γT3	ΣT	ΣT3	ΣTT3
Zm00001d032576	por1	Pos.a	Pos.	Pos.	Pos.	Pos.	Pos.	Pos.	Pos.	Pos.
Zm00001d001896	vte5	Pos.	Pos.	Pos.	Neg.	Neg.	Neg.	Pos.	Neg.	Neg.
Zm00001d006778/Zm00001d006779	vte7	Neg.b	Pos.	Pos.	Pos.	Pos.	Pos.	Pos.	Pos.	Pos.
Zm00001d013937	por2	Pos.	Pos.	Pos.	Pos.	Pos.	Neg.	Pos.	Pos.	Pos.
Zm00001d014734	arodeH2	Neg.	Pos.	Pos.	Pos.	Neg.	Neg.	Pos.	Neg.	Pos.
Zm00001d014737	arodeH2	Pos.	Pos.	Pos.	Pos.	Pos.	Neg.	Pos.	Neg.	Pos.
Zm00001d015356	hppd1	Pos.	Pos.	Pos.	Pos.	Pos.	Pos.	Pos.	Pos.	Pos.
Zm00001d015985	vte1	Neg.	Pos.	Pos.	Pos.	Pos.	Pos.	Pos.	Neg.	Pos.
Zm00001d017746	vte4	Pos.	Neg.	Neg.	Pos.	Neg.	Neg.	Pos.	Neg.	Neg.
Zm00001d017937	samt1	Neg.	Neg.	Pos.	Neg.	Neg.	Neg.	Neg.	Neg.	Neg.
Zm00001d038170	dxs1	Neg.	Pos.	Pos.	Pos.	Pos.	Pos.	Pos.	Pos.	Pos.
Zm00001d019060	dxs2	Neg.	Pos.	Pos.	Pos.	Pos.	Pos.	Pos.	Pos.	Pos.
Zm00001d046558	hggt1	Neg.	Neg.	Neg.	Pos.	Pos.	Pos.	Neg.	Pos.	Pos.
aPositive association between PEER and phenotype after kinship adjustment
bNegative association between PEER and phenotype after kinship adjustment
